# Supplementary material
Source: publisher site journal article supplement (https://www.dovepress.com/get_supplementary_file.php?f=311900.docx)
Supplement: Supplementary file 1 [file get_supplementary_file.php]

**Supplementary Information**

**Interview guide**

Questions will be conducted in a semi-structured interview schedule and include the followings:

- **What illnesses have you experienced?**
- **Are there any patterns in the types of illness you have experienced?**
- **Why do you think you has developed this illness? (Explore for each illness type (e.g. diabetes, heart disease, respiratory conditions or mental/disability condition).**
- **How have you or/and your family managed each illness (what do you do to treat the illness or reduce the symptoms?)**
- **Have you or your family used food or certain diet to treat any illness?**
- **What does the term Folk Remedies mean to you?**
- **Do you believe that folk remedies are effective?**
- **Have you ever used any of the Folk Remedies while being pregnant or with any of your children?**
- **If you have used Folk Remedies, do you think it is effective? Have you experienced any side effects for this treatment?**
- **What do you do to restore your health or your families’ health when you are sick?**
- **When you or someone in your family is ill, what do you usually use first? (Explore use of Folk Remedies and Western medicine and beliefs about why one approach is prioritized over another).**
- **Have you or your family used any Folk Remedies in the past year?**
- **If you have used Folk Remedies, did you discuss this with your doctor or health care provider?**
- **Are there any issues you or your family has experienced in accessing health care support and services?**
- **Is there anything your health care provider can do to help you or your family to manage their health?**
